# Supplementary material for: The Ability of Chlorophyll to Trap Carcinogen Aflatoxin B1: A Theoretical Approach
Source: MDPI journal article supplement (doi:10.3390/ijms23116068), 2022-05-28
Supplement: s1 [file s1]

# The Ability of Chlorophyll to Trap Carcinogen Aflatoxin B<sub>1</sub>, a Theoretical Approach.

Alma Vázquez-Durán, Guillermo Téllez-Isaías, Maricarmen Hernández-Rodríguez, René Miranda Ruvalcaba, Joel Martínez, María Inés Nicolás-Vázquez, Juan Manuel Aceves-Hernández, Abraham Méndez-Albores

## Content

**Figure S1.** M06-2X/6-311G(d,p) optimized geometries of AFB<sub>1</sub>. Atomic charges of selected atoms are in electron units.

**Figure S2.** Reactive sites attained in the electrostatic potential map. The total electron density isosurface mapped with the molecular electrostatic potential of AFB<sub>1</sub>, **chl a 1**, and **chl a 2**. The density = 0.0004 and isovalue = 0.02, at a level of calculation M06-2X/6-311G(d,p). The color scheme for the MEP is as follows: blue for electron-deficient, partially positive charge; light blue for the slightly electron-deficient region; yellow for a slightly electron-rich region and red for electron-rich, partial negative charge [1].

**Figure S3.** HOMO (eV), LUMO (eV) and the inter-frontier molecular orbital energy gaps of the target molecules.

**Figure S4.** Optimized geometry: a) **chl a 1- $\alpha$ -D-AFB<sub>1</sub>**, b) **chl a 1- $\alpha$ -E-AFB<sub>1</sub>**, c) **chl a 1- $\beta$ -D-AFB<sub>1</sub>**, and d) **chl a 1- $\beta$ -E-AFB<sub>1</sub>**.

**Figure S5.** Optimized geometry: a) **chl a 2- $\alpha$ -D-AFB<sub>1</sub>**, b) **chl a 2- $\alpha$ -E-AFB<sub>1</sub>**, c) **chl a 2- $\beta$ -E-AFB<sub>1</sub>**, and d) **chl a 2- $\beta$ -D-AFB<sub>1</sub>**.

**Figure S6.** Optimized geometry of a) **chl a 1-E-2AFB<sub>1</sub>**, and b) **chl a 1-D-2AFB<sub>1</sub>**.

**Figure S7.** Optimized geometry of a) **chl a 2-E-2AFB<sub>1</sub>**, and b) **chl a 2-D-2AFB<sub>1</sub>**.

**Figure S8.** a) RMSD, and b) radius of gyration of **chl a 2**, obtained by MD simulation.

**Table S1.** Natural atomic charges (e<sup>-</sup>) for **chl a 1**, **chl a 2**, AFB<sub>1</sub> and their complexes.

**Table S2.** Interaction energy, in kcal/mol, of complexes **chl a 1-AFB<sub>1</sub>**, and **chl a 2-AFB<sub>1</sub>** in the gas phase.

**Table S3.** Interaction energy, in kcal/mol, of complexes **chl a 1-2AFB<sub>1</sub>**, and **chl a 2-2AFB<sub>1</sub>** in water as solvent.

**Table S4.** Cartesian coordinates for the more stable optimized geometries.

**AFB<sub>1</sub>** = aflatoxin B<sub>1</sub>

**chl a 2** = folded chlorophyll a.

**chl a 1- $\alpha$ -E-AFB<sub>1</sub>** = **AFB<sub>1</sub>** coordinated to unfolded chlorophyll a.

**chl a 2- $\beta$ -E-AFB<sub>1</sub>** = **AFB<sub>1</sub>** coordinated to folded chlorophyll a.

**chl a 1-D-2AFB<sub>1</sub>** = **2AFB<sub>1</sub>** coordinate to unfolded chlorophyll a.

**chl a 2-E-2AFB<sub>1</sub>** = **2AFB<sub>1</sub>** coordinate to folded chlorophyll a.

**chl a 2-AFB<sub>1c</sub>** = an intermolecular hydrogen bond between **AFB<sub>1</sub>** and chlorophyll a.

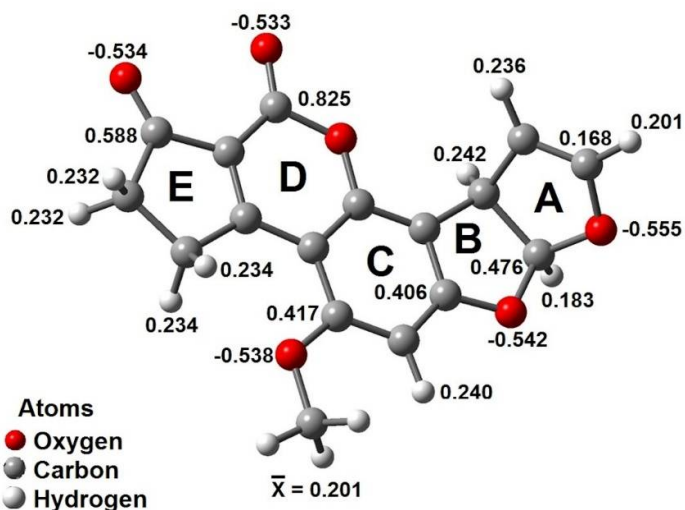

**Figure S1.** M06-2X/6-311G(d,p) optimized geometries of AFB<sub>1</sub>. Atomic charges of selected atoms are in electron units.

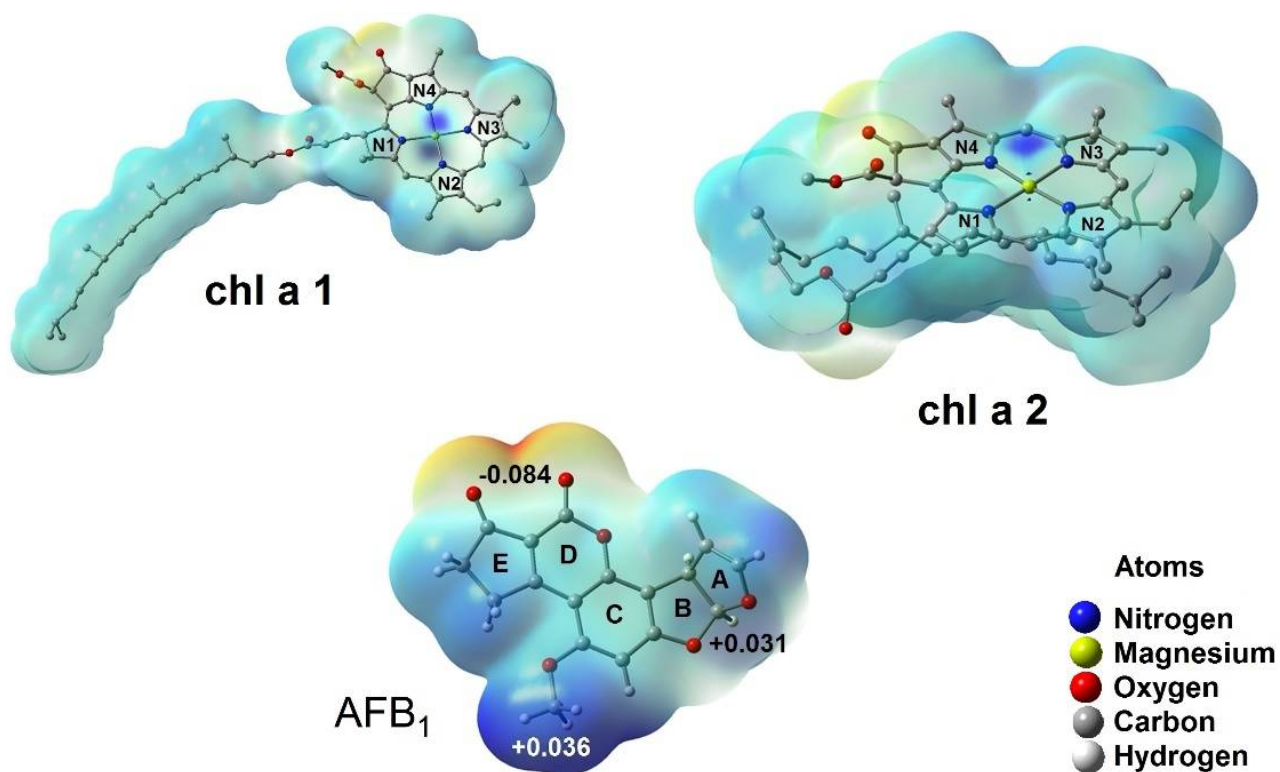

**Figure S2.** Reactive sites attained in the electrostatic potential map. The total electron density isosurface mapped with the molecular electrostatic potential of AFB<sub>1</sub>, **chl a 1**, and **chl a 2**. The density = 0.0004 and isovalue = 0.02, at a level of calculation M06-2X/6-311G(d,p). The color scheme for the MEP is as follows: blue for electron-deficient, partially positive charge; light blue for the slightly electron-deficient region; yellow for a slightly electron-rich region and red for electron-rich, partial negative charge [1].

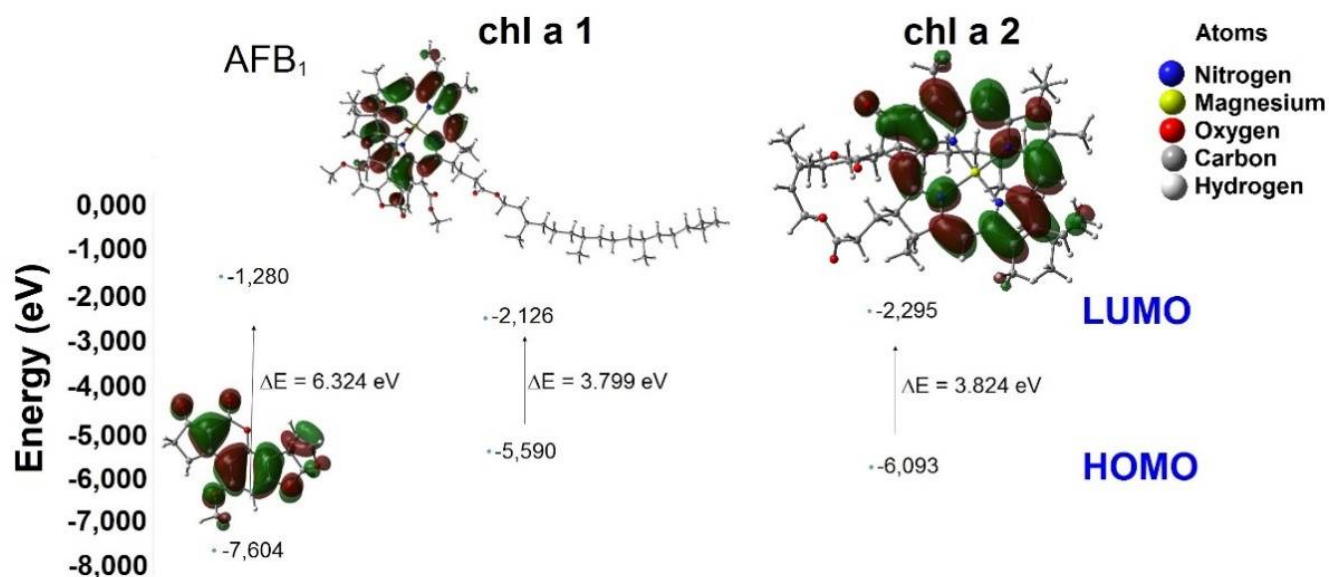

Figure S3. HOMO (eV), LUMO (eV) and the inter-frontier molecular orbital energy gaps of the target molecules.

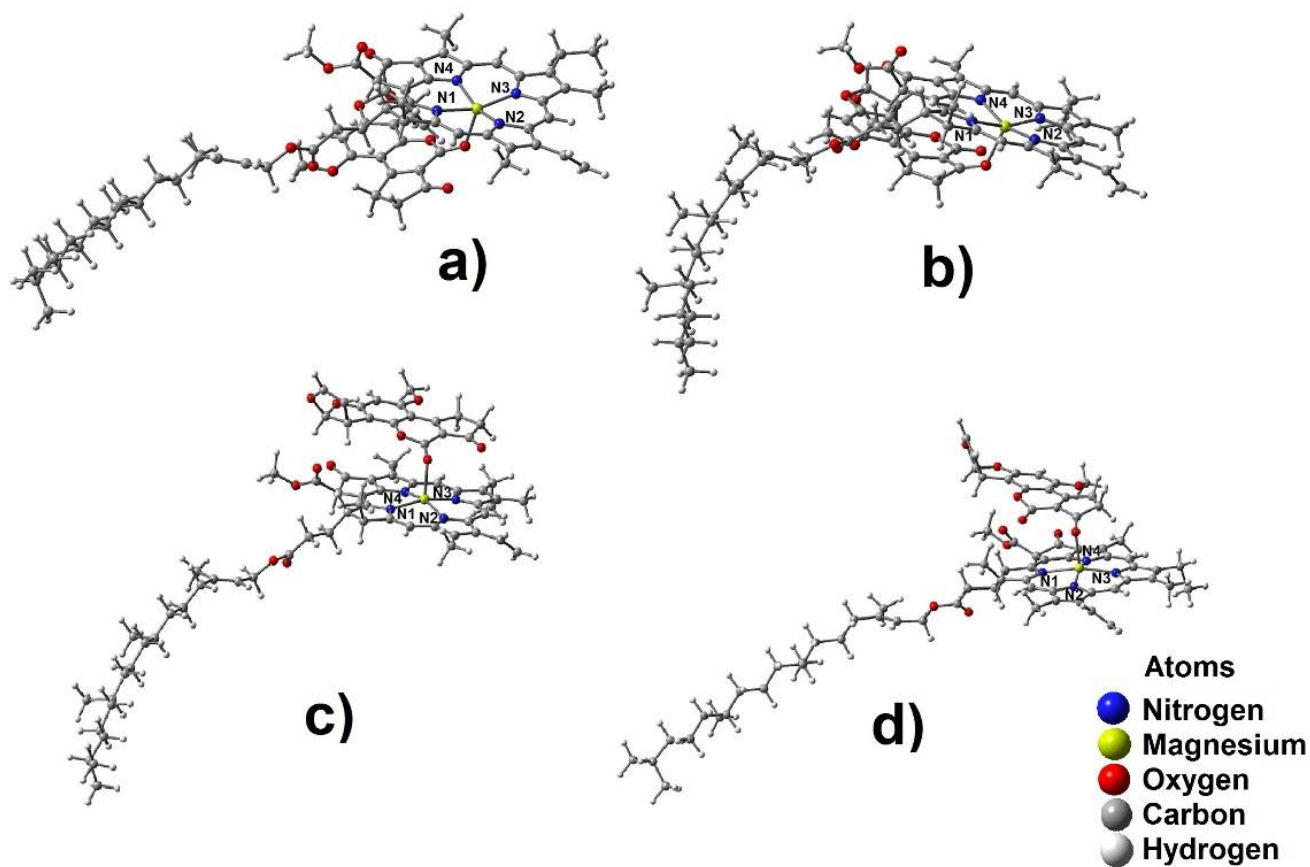

Figure S4. Optimized geometry: a) chl a 1- $\alpha$ -D-AFB<sub>1</sub>, b) chl a 1- $\alpha$ -E-AFB<sub>1</sub>, c) chl a 1- $\beta$ -D-AFB<sub>1</sub>, and d) chl a 1- $\beta$ -E-AFB<sub>1</sub>.

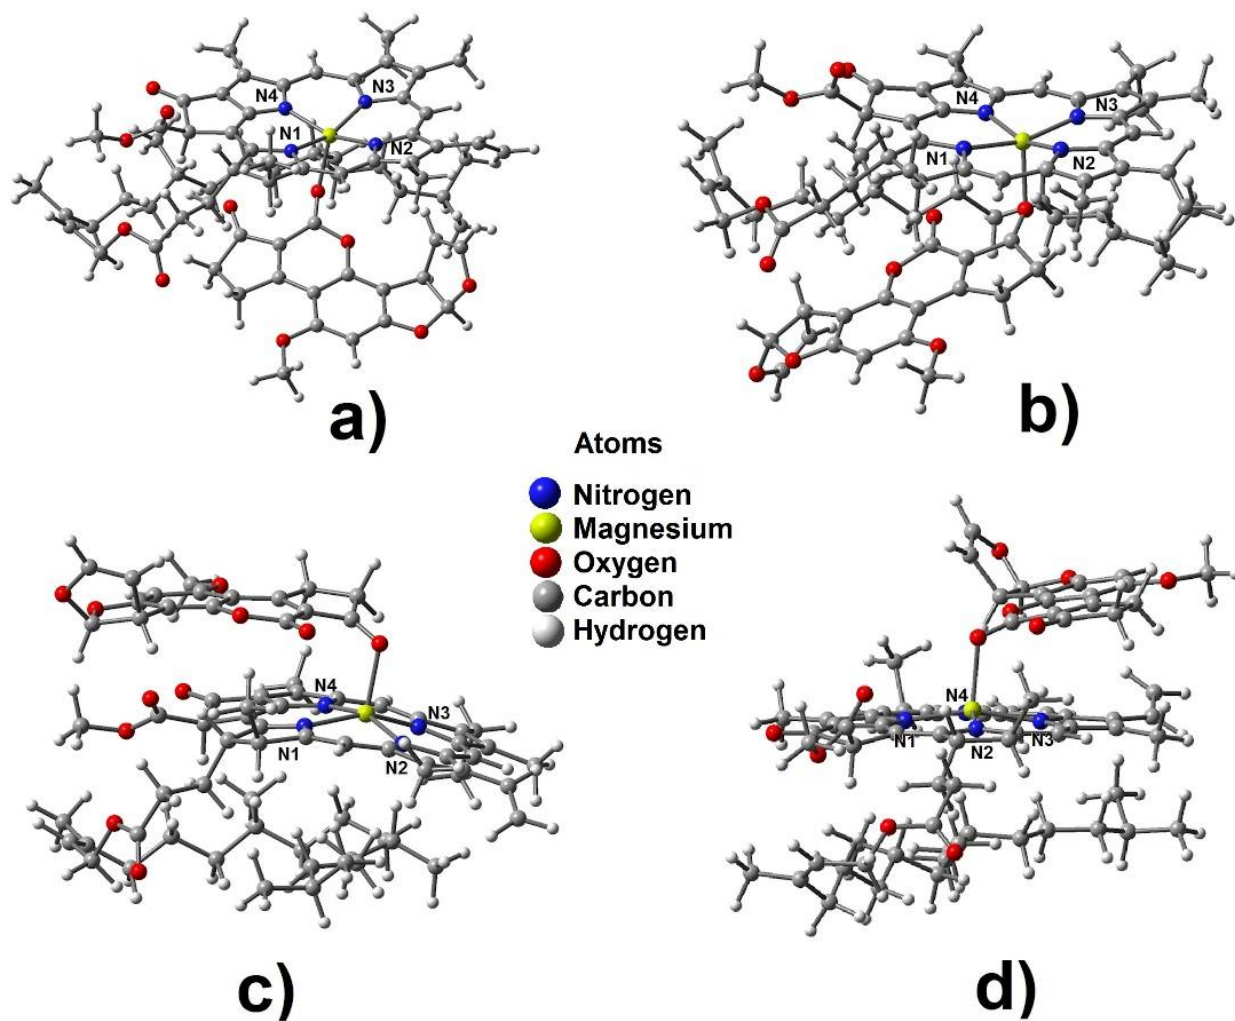

**Figure S5.** Optimized geometry: a) chl a 2- $\alpha$ -D-AFB<sub>1</sub>, b) chl a 2- $\alpha$ -E-AFB<sub>1</sub>, c) chl a 2- $\beta$ -E-AFB<sub>1</sub>, and d) chl a 2- $\beta$ -D-AFB<sub>1</sub>.

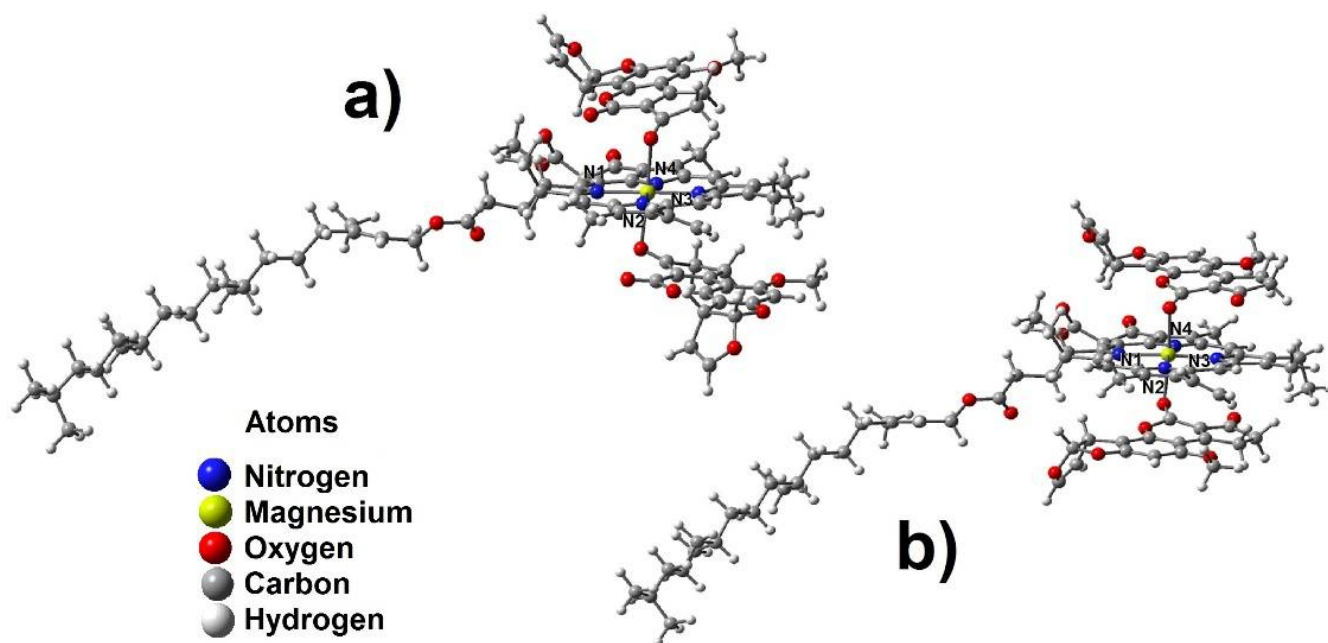

**Figure S6.** Optimized geometry of a) chl a 1-E-2AFB<sub>1</sub>, and b) chl a 1-D-2AFB<sub>1</sub>.



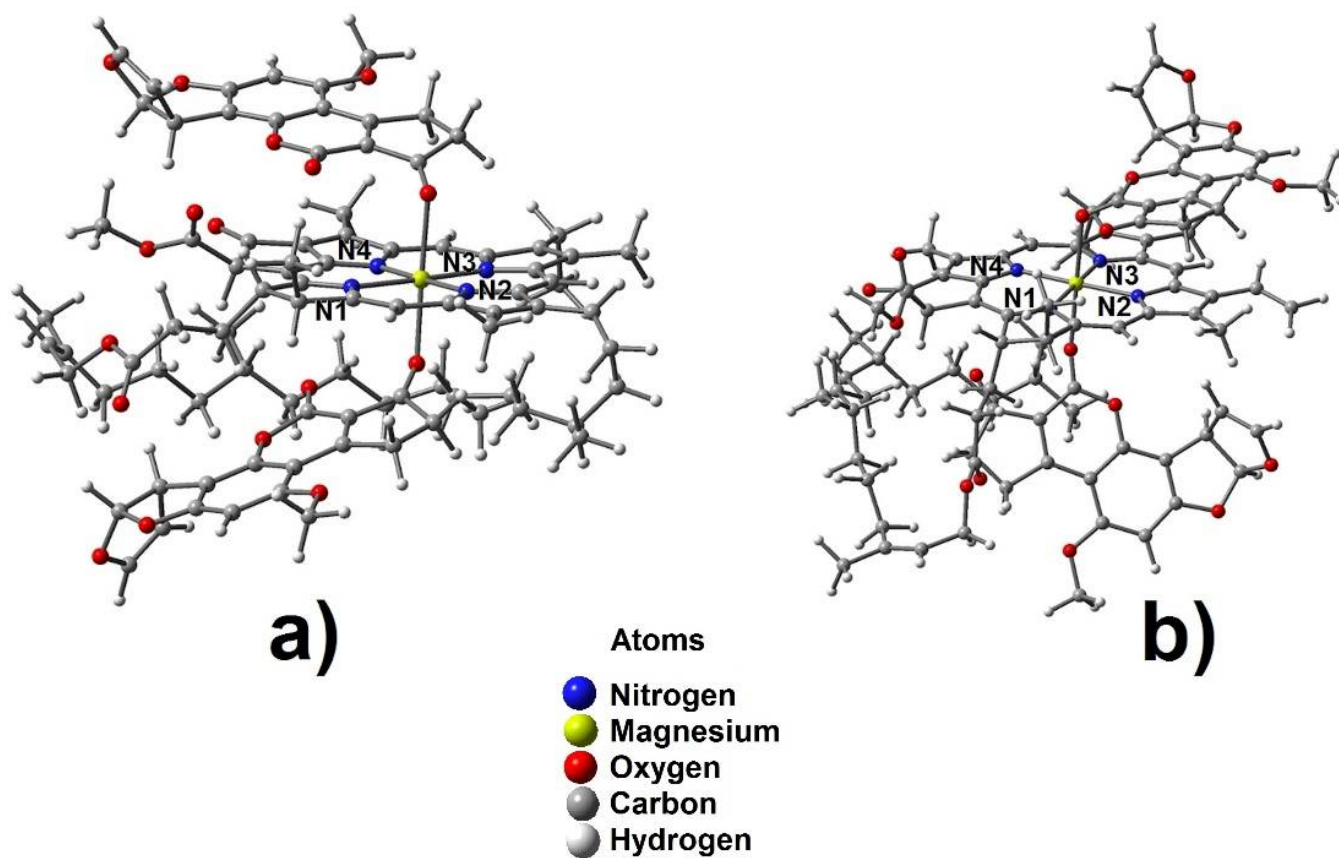

Figure S7. Optimized geometry of a) chl a 2-E-2AFB<sub>1</sub>, and b) chl a 2-D-2AFB<sub>1</sub>.

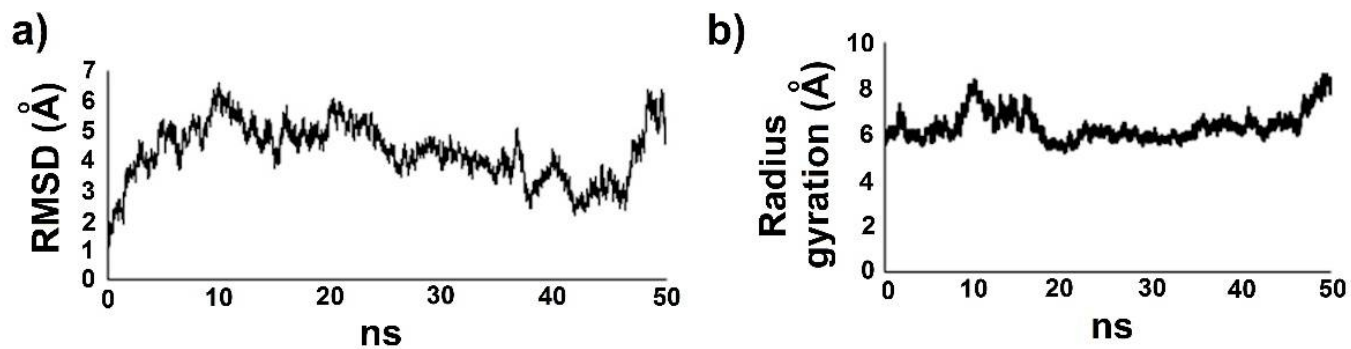

Figure S8. a) RMSD, and b) radius of gyration of chl a 2, obtained by MD simulation.

**Table S1.** Natural atomic charges (e<sup>-</sup>) for **chl a 1**, **chl a 2**, AFB<sub>1</sub> and their complexes.

|                                                      | Mg <sup>2+</sup> | N1     | N2     | N3     | N4     | O*     | C*    |
|------------------------------------------------------|------------------|--------|--------|--------|--------|--------|-------|
| <b>chl a 2</b>                                       | 1.762            | -0.796 | -0.745 | -0.770 | -0.726 |        |       |
| <b>chl a 1</b>                                       | 1.758            | -0.792 | -0.744 | -0.769 | -0.725 |        |       |
| <b>chl a 1-<math>\alpha</math>-D-AFB<sub>1</sub></b> | 1.759            | -0.763 | -0.708 | -0.730 | -0.693 | -0.697 | 0.873 |
| <b>chl a 1-<math>\alpha</math>-E-AFB<sub>1</sub></b> | 1.760            | -0.698 | -0.760 | -0.706 | -0.734 | -0.695 | 0.646 |
| <b>chl a 1-<math>\beta</math>-E-AFB<sub>1</sub></b>  | 1.758            | -0.767 | -0.716 | -0.744 | -0.691 | -0.695 | 0.641 |
| <b>chl a 1-<math>\beta</math>-D-AFB<sub>1</sub></b>  | 1.757            | -0.763 | -0.712 | -0.745 | -0.694 | -0.699 | 0.868 |
| <b>chl a 2-<math>\alpha</math>-D-AFB<sub>1</sub></b> | 1.760            | -0.763 | -0.723 | -0.737 | -0.690 | -0.686 | 0.877 |
| <b>chl a 2-<math>\alpha</math>-E-AFB<sub>1</sub></b> | 1.765            | -0.746 | -0.721 | -0.742 | -0.695 | -0.687 | 0.648 |
| <b>chl a 2-<math>\beta</math>-E-AFB<sub>1</sub></b>  | 1.766            | -0.779 | -0.718 | -0.755 | -0.704 | -0.697 | 0.643 |
| <b>chl a 2-<math>\beta</math>-D-AFB<sub>1</sub></b>  | 1.762            | -0.768 | -0.715 | -0.747 | -0.691 | -0.691 | 0.870 |
| <b>chl a 1-D-2AFB<sub>1</sub></b>                    | 1.753            | -0.763 | -0.713 | -0.727 | -0.672 | -0.664 | 0.869 |
|                                                      |                  |        |        |        |        | -0.612 | 0.853 |
| <b>chl a 1-E-2AFB<sub>1</sub></b>                    | 1.753            | -0.751 | -0.723 | -0.737 | -0.662 | -0.650 | 0.638 |
|                                                      |                  |        |        |        |        | -0.622 | 0.624 |
| <b>chl a 2-D-2AFB<sub>1</sub></b>                    | 1.749            | -0.737 | -0.693 | -0.711 | -0.669 | -0.631 | 0.866 |
|                                                      |                  |        |        |        |        | -0.640 | 0.865 |
| <b>chl a 2-E-2AFB<sub>1</sub></b>                    | 1.756            | -0.737 | -0.703 | -0.726 | -0.673 | -0.643 | 0.638 |
|                                                      |                  |        |        |        |        | -0.644 | 0.642 |
|                                                      |                  |        |        | E      |        | D      |       |
|                                                      |                  |        |        | O      | C      | O      | C     |
| AFB <sub>1</sub>                                     |                  |        |        | -0.534 | 0.588  | -0.533 | 0.825 |

E= specific oxygen atom of carbonyl group on ring E, D = specific oxygen atom of lactone group on ring D, O\* and C\*= atoms of AFB<sub>1</sub> when have coordinated to the Mg<sup>2+</sup> ion.

**Table S2.** Interaction energy, in kcal/mol, of complexes **chl a 1-AFB<sub>1</sub>**, and **chl a 2-AFB<sub>1</sub>** in the gas phase.

| Molecule                              | Interaction energy | Energy differences between chlorophylls | Energy difference considering carbonylic interaction |
|---------------------------------------|--------------------|-----------------------------------------|------------------------------------------------------|
|                                       | kcal/mol           |                                         |                                                      |
| chl a 1- $\alpha$ -D-AFB <sub>1</sub> | -32.1              | 4.3                                     | 3.6                                                  |
| chl a 1- $\alpha$ -E-AFB <sub>1</sub> | -36.4              | 0.0                                     | 0.0                                                  |
| chl a 1- $\beta$ -E-AFB <sub>1</sub>  | -35.5              | 0.9                                     | 0.9                                                  |
| chl a 1- $\beta$ -D-AFB <sub>1</sub>  | -35.7              | 0.7                                     | 0.0                                                  |
| chl a 2- $\alpha$ -D-AFB <sub>1</sub> | -33.3              | 5.9                                     | 0.0                                                  |
| chl a 2- $\alpha$ -E-AFB <sub>1</sub> | -36.5              | 2.7                                     | 2.7                                                  |
| chl a 2- $\beta$ -E-AFB <sub>1</sub>  | -39.2              | 0.0                                     | 0.0                                                  |
| chl a 2- $\beta$ -D-AFB <sub>1</sub>  | -32.8              | 6.4                                     | 0.4                                                  |
| chl a 1-AFB <sub>1</sub> a            | -17.0              |                                         |                                                      |
| chl a 1-AFB <sub>1</sub> b            | -15.6              |                                         |                                                      |
| chl a 2-AFB <sub>1</sub> c            | -29.6              |                                         |                                                      |
| chl a 2-AFB <sub>1</sub> d            | -20.4              |                                         |                                                      |
| chl a 1-E-2AFB <sub>1</sub>           | -60.0              | 2.2                                     | 20.1                                                 |
| chl a 1-D-2AFB <sub>1</sub>           | -62.3              | 0.0                                     | 11.2                                                 |
| chl a 2-E-2AFB <sub>1</sub>           | -64.8              | 0.0                                     | 0.0                                                  |
| chl a 2-D-2AFB <sub>1</sub>           | -58.0              | 6.7                                     | 0.0                                                  |

a and b = three hydrogen bond interactions, c = one hydrogen bond interaction, d = two hydrogen bond interactions.

**Table S3.** Interaction energy, in kcal/mol, of complexes **chl a 1-2AFB<sub>1</sub>**, and **chl a 2-2AFB<sub>1</sub>** in water as solvent.

| Chemical system                       | Interaction energy | Energy differences between<br>chlorophylls | Energy difference considering<br>carbonylic interaction |
|---------------------------------------|--------------------|--------------------------------------------|---------------------------------------------------------|
|                                       |                    | kcal/mol                                   | kcal/mol                                                |
| chl a 1- $\alpha$ -D-AFB <sub>1</sub> | -22.6              | 3.9                                        | 3.8                                                     |
| chl a 1- $\alpha$ -E-AFB <sub>1</sub> | -26.5              | 0.0                                        | 0.0                                                     |
| chl a 1- $\beta$ -E-AFB <sub>1</sub>  | -23.6              | 2.9                                        | 2.9                                                     |
| chl a 1- $\beta$ -D-AFB <sub>1</sub>  | -26.4              | 0.1                                        | 0.0                                                     |
| chl a 2- $\alpha$ -D-AFB <sub>1</sub> | -23.4              | 4.5                                        | 3.3                                                     |
| chl a 2- $\alpha$ -E-AFB <sub>1</sub> | -27.6              | 0.3                                        | 0.3                                                     |
| chl a 2- $\beta$ -E-AFB <sub>1</sub>  | -27.9              | 0.0                                        | 0.0                                                     |
| chl a 2- $\beta$ -D-AFB <sub>1</sub>  | -26.6              | 1.3                                        | 0.0                                                     |
| chl a 1-AFB <sub>1</sub> a            | -10.3              |                                            |                                                         |
| chl a 1-AFB <sub>1</sub> b            | -11.2              |                                            |                                                         |
| chl a 2-AFB <sub>1</sub> c            | -23.0              |                                            |                                                         |
| chl a 2-AFB <sub>1</sub> d            | -14.4              |                                            |                                                         |
| chl a 1-E-2AFB <sub>1</sub>           | -45.9              | 3.1                                        | 13.1                                                    |
| chl a 1-D-2AFB <sub>1</sub>           | -49.0              | 0.0                                        | 8.7                                                     |
| chl a 2-E-2AFB <sub>1</sub>           | -47.6              | 0.0                                        | 0.0                                                     |
| chl a 2-D-2AFB <sub>1</sub>           | -46.3              | 1.3                                        | 0.0                                                     |

a and b = three hydrogen bond interactions, c = one hydrogen bond interaction, d = two hydrogen bond interactions.

**Table S4.** Cartesian coordinate

| AFB <sub>1</sub> |             |             |             | chl a 2 |             |             |             | chl a 1- $\alpha$ -AFB <sub>1</sub> |             |             |             |    |              |             |              |   |             |             |             |
|------------------|-------------|-------------|-------------|---------|-------------|-------------|-------------|-------------------------------------|-------------|-------------|-------------|----|--------------|-------------|--------------|---|-------------|-------------|-------------|
| O1               |             |             |             | O1      |             |             |             | O1                                  |             |             |             |    |              |             |              |   |             |             |             |
| C                | 3.97611200  | -1.04111000 | 0.09524100  | Mg      | -1.74528200 | -0.15458700 | -1.10972300 | H                                   | 2.12533400  | -5.23279100 | -1.52614700 | Mg | -5.04515200  | 2.62023600  | 0.24818000   | H | 5.46154600  | -4.05418300 | 1.74152200  |
| C                | 4.66777900  | -2.02098700 | 0.08248700  | N       | -3.08474400 | -1.65161200 | -0.97568800 | H                                   | 0.99765900  | -4.45282500 | -2.64258300 | N  | -4.55355000  | 4.59720000  | 0.30025000   | H | 7.01901200  | -4.04542500 | 2.57864900  |
| C                | 4.47256400  | 0.39949900  | 0.25272600  | C       | -4.45654900 | -1.52729500 | -1.10286700 | C                                   | 3.15220800  | -2.38470700 | 0.13230300  | C  | -5.38757900  | 5.62857900  | -0.06678300  | C | 7.96219600  | -1.64028700 | 1.87880100  |
| C                | 5.17443000  | 0.61354400  | -0.55520400 | C       | -5.05786300 | -2.85027000 | -0.88980800 | H                                   | 2.68758500  | -2.20283900 | 1.11967000  | C  | -4.61692000  | 6.87799900  | -0.08526840  | H | 7.91616500  | -0.54053500 | 1.83306700  |
| H                | 5.02225400  | 0.47604600  | 1.19130600  | C       | -4.03165600 | -3.72964200 | -0.69769600 | C                                   | 3.78170400  | -1.49761400 | -0.06882300 | C  | -3.35579000  | 5.56230200  | 0.32406000   | H | 8.21533300  | -1.90779500 | 2.91304700  |
| C                | 3.22487300  | 1.29070000  | 0.21338200  | C       | -2.80105500 | -2.95694400 | -0.77370300 | C                                   | 4.06838300  | -3.59282400 | 0.18075200  | C  | -3.33745700  | 5.18272000  | 0.54529200   | C | 9.02871600  | -1.23734200 | 0.95534600  |
| H                | 3.23447600  | 2.01391400  | -0.60315100 | C       | -6.48461000 | -3.17542400 | -0.95313400 | H                                   | 3.54429500  | -4.48384000 | 0.52829100  | C  | -5.10438100  | 8.20610900  | -0.46202000  | H | 8.81804300  | -1.90032700 | -0.08263800 |
| H                | 3.07767600  | 1.86641000  | 1.12835500  | H       | -6.83396100 | -3.94046000 | -1.26300600 | H                                   | 4.46668500  | -3.77816000 | -0.82221000 | H  | -4.75319100  | 9.03663200  | 0.14574500   | H | 15.31977000 | -3.22687200 | 1.02786500  |
| C                | 2.07363000  | 0.32835700  | 0.20258700  | C       | -7.35461500 | -2.62735000 | -0.80702400 | C                                   | 5.22463600  | -3.34074700 | 1.18017000  | C  | -5.90202200  | 8.43682900  | -1.49768800  | C | 10.43397000 | -0.54055200 | 1.30075500  |
| C                | 2.50227600  | -0.96072200 | -0.03402800 | H       | -8.39701000 | -2.92165600 | -1.79818600 | O                                   | 5.43780200  | -3.91968300 | 2.14672600  | H  | -6.21539700  | 9.47648700  | -1.72307600  | H | 10.29437300 | -0.42102800 | 1.13927400  |
| C                | 1.60571700  | -2.09327600 | -0.20051000 | H       | -7.04378000 | -1.89267700 | -2.53571000 | O                                   | 5.98408000  | -2.62859000 | 0.16637960  | H  | -6.24334900  | 7.76749400  | -1.85068800  | H | 10.75427300 | -1.85668500 | 2.28812200  |
| O                | 1.86985100  | -3.24957000 | -0.25583500 | C       | -4.09854200 | -5.20684400 | -0.48434900 | C                                   | 7.06058300  | -1.90546900 | 1.53416300  | C  | -2.17689000  | 7.46533400  | 0.49010400   | C | 11.54747000 | -1.76853300 | 0.28476900  |
| O                | 0.25228000  | -1.73577000 | -0.30526000 | H       | -3.62196100 | -5.48519300 | 0.46358600  | H                                   | 7.72777000  | -2.75590000 | 1.68870800  | H  | -1.35837600  | 7.16499900  | -0.17008900  | H | 11.21615600 | -1.37289900 | -0.68554100 |
| C                | 0.67733000  | 0.63841400  | -0.07842100 | C       | -3.57636900 | -5.74448900 | -1.28252400 | H                                   | 6.63086700  | -3.87376000 | 2.50026400  | H  | -1.79966900  | 7.43468800  | 1.15615800   | C | 12.08947400 | -1.00226500 | 0.68890200  |
| C                | -0.18872800 | -0.48154500 | -0.25480300 | H       | -5.10308900 | -5.55612500 | -0.46985300 | C                                   | 7.74745900  | -0.76469400 | 0.85860300  | H  | -2.43436200  | 5.49146000  | 0.25088300   | H | 12.53653900 | 0.04023300  | 0.91777000  |
| C                | -1.25721300 | 2.14418100  | -0.13466800 | C       | -5.13612200 | -0.32542000 | -1.04273700 | C                                   | 7.52467600  | -0.52889000 | 1.10244400  | H  | -6.73885700  | 5.84729000  | -0.29551000  | H | 13.17343000 | -0.40253800 | 1.65454000  |
| C                | -1.54953100 | -0.27026500 | -0.38316400 | H       | -6.21658400 | -0.38066700 | -0.97896400 | H                                   | 8.43728600  | -1.03515700 | 0.06324400  | H  | -7.27878700  | 6.43012800  | -0.52177400  | C | 13.94827400 | -1.02513300 | -0.32045000 |
| H                | -1.76504200 | -0.32103600 | -0.09099900 | C       | -3.25886600 | 1.23974400  | -1.22710000 | C                                   | 8.18194200  | 1.59351900  | 0.26784300  | H  | -7.051078500 | 3.18429000  | 0.08254400   | H | 13.57695700 | -0.68048300 | -1.42944000 |
| C                | -2.05129200 | 1.04959500  | -0.31829700 | C       | -4.57763000 | 0.97493800  | -1.08008800 | H                                   | 7.42016900  | 1.16385500  | -0.27877900 | C  | -7.52610700  | 6.34624300  | -0.29262200  | H | 14.25793200 | -0.25616900 | -0.46355900 |
| C                | 0.11250400  | 1.94021400  | -0.01976300 | C       | -3.13265800 | 2.60776700  | -1.29470300 | H                                   | 8.87749800  | 1.16772300  | -0.45670400 | C  | -8.12147000  | 2.25635000  | 0.08753500   | C | 15.11913400 | -0.44235700 | 0.1183600   |
| O                | 0.99362200  | 2.94701000  | 0.15263600  | C       | -4.43573800 | 3.22236200  | -1.04746000 | H                                   | 8.72696200  | 2.30231000  | 0.89767800  | C  | -9.32791000  | 2.98062300  | -0.26769400  | H | 14.37248400 | 0.85045000  | 0.37260000  |
| C                | 0.49297000  | 4.27225500  | 0.21944200  | C       | -5.34005900 | 2.18946700  | -1.04577700 | C                                   | 6.55098200  | 1.03760700  | 2.14060600  | C  | -8.95616700  | 4.28272300  | -0.45685600  | H | 15.55083000 | -0.55140000 | 1.03182900  |
| H                | -0.11819500 | 4.54245300  | -0.70876600 | C       | -6.82388700 | 2.77812400  | -0.84639900 | H                                   | 6.51619300  | 0.37949100  | 3.01795300  | C  | -8.91305100  | 5.55494600  | -0.85172000  | C | 15.73017000 | 0.03109400  | -1.93172500 |
| H                | 1.36150800  | 4.91008700  | 0.35814700  | H       | -7.13330100 | 1.77146000  | 0.05502200  | H                                   | 6.89812100  | 2.01427200  | 2.50020300  | H  | -9.84215900  | 8.89447000  | -1.79619700  | H | 15.77819100 | -0.45756200 | -1.83668400 |
| H                | -0.18832300 | 4.38899400  | 1.06649900  | H       | -7.35240400 | 1.79806900  | -1.69477600 | C                                   | 5.14150200  | 1.18437900  | 1.55409300  | H  | -9.76761000  | 7.24239500  | -0.09627400  | H | 17.26860000 | 1.03043100  | -0.40855500 |
| O                | -3.39296700 | 1.07027500  | -0.44604000 | H       | -7.16066600 | 3.31642000  | -0.90498200 | H                                   | 4.82132300  | 0.19379500  | 1.02943500  | H  | -10.84510600 | 5.15760000  | -0.97882900  | H | 16.74577900 | 1.95493800  | -0.12663800 |
| O                | -4.80161600 | -0.57873700 | 0.38475400  | C       | -4.68631900 | 4.69785000  | -1.17318000 | H                                   | 5.19638100  | 1.81565600  | 0.65391900  | C  | -10.67380700 | 2.35621000  | -0.46629700  | H | 17.70910800 | 0.63301300  | 0.51652200  |
| C                | -3.03731200 | -1.97295000 | 0.75221800  | H       | -5.72142000 | 4.90825600  | -1.39810300 | C                                   | 4.11246100  | 1.74089000  | 2.54376900  | H  | -11.45287300 | 3.11035700  | -0.34665600  | H | 18.38751000 | 1.38126800  | -1.38894800 |
| H                | -2.40863500 | -2.71018300 | 1.27159900  | C       | -4.06282000 | 5.20952300  | -1.85628300 | C                                   | 3.89486000  | 0.19739400  | 3.29404100  | H  | -10.85474900 | 1.16038500  | 0.31335000   | H | 17.54534700 | 1.60676500  | -2.35721800 |
| C                | -4.20450000 | -1.52249000 | 1.18749400  | C       | -4.40502000 | 5.26504400  | -0.28065700 | H                                   | 4.54169900  | 2.51933500  | 3.06847000  | C  | -10.78951700 | 1.70391900  | -1.85129700  | H | 19.02623300 | 0.50902200  | -1.56177800 |
| H                | -4.77845600 | -1.78905500 | 2.06201400  | C       | -4.56874600 | 6.34442000  | -1.31060600 | C                                   | 2.81289000  | 2.08326000  | 1.85765000  | H  | -11.76190400 | 1.22389300  | -1.98238000  | C | 19.52523600 | 2.53482700  | -0.88019400 |
| C                | -2.69127000 | -1.23606600 | -0.52301500 | H       | -3.37276400 | 5.06102900  | 0.57702700  | H                                   | 2.54460700  | 1.42056200  | 1.18538000  | H  | -10.00545200 | 0.95632300  | -1.193255900 | H | 18.64908500 | 3.45197500  | -0.84536800 |
| C                | -2.5817800  | -1.90080300 | -1.38165300 | H       | -5.05683900 | 4.78397000  | 1.01870700  | C                                   | 1.60836600  | 2.28773800  | 2.80266100  | H  | -10.69705000 | 2.50663200  | -2.63313100  | H | 19.55007500 | 2.32331000  | 0.15347500  |
| C                | -3.89967800 | -0.25926300 | -0.64292000 | H       | -1.92188100 | 3.297299400 | -1.47065600 | H                                   | 1.68120600  | 1.53283300  | 3.59346500  | C  | -10.51674600 | 2.94346700  | 0.39707900   | C | 20.51367600 | 0.50052800  | -1.70719900 |
| H                | -4.44188700 | -0.25572600 | -1.58587500 | H       | -1.98806200 | 4.27288900  | -1.56932600 | H                                   | 1.61676600  | 3.26399300  | 3.30459900  | H  | -8.98968800  | 0.34363700  | 0.33498000   | C | 21.12152400 | 1.89149300  | -1.69903600 |
|                  |             |             |             | C       | -0.65904600 | 2.72024800  | -1.53535300 | C                                   | 0.28073400  | 2.09232400  | 2.06089800  | C  | -6.91757900  | 0.18396500  | 0.76427900   | C | 18.82057500 | -2.26489900 | 0.12352400  |
|                  |             |             |             | N       | -0.45831500 | 1.35904700  | -1.34977800 | H                                   | 0.18315100  | 1.03062200  | 1.80461900  | N  | -5.67273200  | 0.78492200  | 0.86350500   | H | 10.93149000 | -3.80343100 | -0.20892800 |
|                  |             |             |             | C       | -1.51552100 | -3.50395900 | -0.65682600 | H                                   | 0.29791500  | 2.63039300  | 1.10483300  | C  | -2.20408000  | 4.40350700  | 0.96219000   | H | 12.40645200 | -3.69624900 | 1.07838700  |
|                  |             |             |             | H       | -1.46629700 | -4.56890500 | -0.46862100 | C                                   | -0.91948800 | 2.56987200  | 2.87572400  | H  | -1.30279400  | 4.98459800  | 1.12042200   | H | 10.60533500 | -3.45322600 | -0.61085100 |
|                  |             |             |             | C       | -0.29808900 | -2.84552100 | -0.27508000 | H                                   | -0.82029400 | 2.21746800  | 3.91204200  | C  | -2.10649700  | 3.04045500  | 1.27595600   | H | 6.87370700  | -1.30649400 | -1.30218200 |
|                  |             |             |             | H       | -0.1218200  | -1.52865300 | -0.98951500 | H                                   | -0.88137800 | 3.66467500  | 2.92425000  | N  | -1.30733900  | 1.21856600  | 1.06892000   | H | 16.14231900 | -2.00804000 | -1.70724700 |
|                  |             |             |             | C       | 1.22357200  | -1.23803800 | -1.07905500 | C                                   | -2.29478900 | 2.13425200  | 2.35543400  | C  | -2.62299500  | 0.87492500  | 1.39400300   | H | 17.33029200 | -1.76567700 | -0.4184800  |
|                  |             |             |             | C       | 0.84842200  | 1.16621200  | -1.45065200 | H                                   | -2.36742800 | 2.38372100  | 1.28997200  | C  | -4.82453900  | -0.18632100 | 1.15706200   | H | 17.65274900 | -1.17912500 | -2.05583100 |
|                  |             |             |             | C       | 1.68421600  | 0.02973700  | -1.3192100  | C                                   | -2.46898700 | 1.60872500  | 2.49759400  | C  | -3.42100800  | -0.29246000 | 1.37261300   | C | 13.21387800 | 0.33046500  | -1.07373300 |
|                  |             |             |             | C       | 0.60002000  | 3.38035500  | -1.77633700 | H                                   | -1.89977200 | 0.89289300  | 1.71083600  | C  | -8.16686800  | -1.22331500 | 1.04382000   | H | 20.75808100 | 4.86367000  | -1.0771200  |
|                  |             |             |             | C       | 1.54421000  | 2.36830000  | -1.72630300 | H                                   | -2.01042000 | 0.29155700  | 3.44437000  | C  | -5.46456700  | 1.44447200  | 1.21613100   | H | 22.25886100 | 1.01597000  | -1.62247500 |
|                  |             |             |             | C       | 0.82060300  | 1.83374900  | -2.01229200 | C                                   | -3.91897400 | 0.10344000  | 2.47800000  | C  | -7.92176400  | -2.22652300 | 0.96862600   | H | 21.58729600 | 3.69893800  | -0.03695800 |
|                  |             |             |             | H       | 0.25679000  | 5.18665000  | -2.18849400 | H                                   | -4.42409300 | 0.47842800  | 1.58401500  | H  | -8.69767600  | -2.00329800 | 1.70543700   | C | 20.18106200 | 3.14352700  | -3.16189500 |
|                  |             |             |             | H       | 1.87878600  | 5.0310000   | -2.8171200  | H                                   | -4.44396900 | 5.52020400  | 3.34089700  | H  | -7.52390600  | -3.22050600 | 1.17958300   | H | 19.51030940 | 4.10045300  | -3.2061700  |
|                  |             |             |             | H       | 0.49932300  | 5.42891000  | -1.14904400 | C                                   | -4.00314100 | -1.42263200 | 2.53650000  | H  | -8.38910000  | -2.25277300 | -0.02134800  | H | 19.69078800 | 2.31646600  | -3.67400800 |
|                  |             |             |             | C       | 2.          |             |             |                                     |             |             |             |    |              |             |              |   |             |             |             |



| chl a 2-β-E-AFB <sub>1</sub> |             |             |             |   | chl a 1-D-2AFB <sub>1</sub> |             |             |    |              |             |             |   |              |             |             |
|------------------------------|-------------|-------------|-------------|---|-----------------------------|-------------|-------------|----|--------------|-------------|-------------|---|--------------|-------------|-------------|
| O1                           |             |             |             |   | O1                          |             |             |    |              |             |             |   |              |             |             |
| Mg                           | 2.35789400  | -0.91822900 | -0.94294600 | H | -6.50999900                 | 147613200   | 4.57445000  | Mg | -4.16600000  | 194300000   | -0.51000000 | H | 15.97800000  | -0.61800000 | 0.32700000  |
| N                            | 3.69091000  | 0.40553000  | -1.70689000 | H | -5.55632900                 | 155005000   | 6.06630900  | N  | -3.87000000  | 3.91900000  | -0.17900000 | C | 16.46800000  | 1.07700000  | 1.56200000  |
| C                            | 5.05653080  | 0.33218000  | -1.6140900  | C | -3.18853700                 | 2.49872600  | 4.88779900  | C  | -4.80500000  | 4.90900000  | -0.35500000 | H | 15.99900000  | 1.98800000  | 1.91600000  |
| C                            | 5.65223600  | 1.35767000  | -2.48003600 | H | -2.77247000                 | 3.50933200  | 4.89376900  | C  | -4.27700000  | 6.16300000  | 0.20000000  | H | 16.68800000  | 0.46900000  | 2.45500000  |
| C                            | 4.62772300  | 1.99807400  | -3.09885900 | H | -3.17936700                 | 2.15249700  | 5.92599900  | C  | -3.05500000  | 5.87300000  | 0.72500000  | C | 17.82600000  | 1.47000000  | 0.92300000  |
| C                            | 3.39650000  | 1.40673000  | -2.48007000 | C | -2.28208700                 | 1.58467300  | 4.0538900   | C  | -2.87000000  | 4.45400000  | 0.46800000  | H | 17.60600000  | 0.30320000  | 0.00500000  |
| C                            | 7.08951000  | 1.57968000  | -2.6345600  | C | -2.30576900                 | 1.94599000  | 3.01615900  | C  | -4.92800000  | 7.47600000  | 0.17700000  | H | 18.59800000  | 2.40000000  | 1.86800000  |
| H                            | 7.72363600  | 0.69720800  | -2.59823000 | H | -2.70470000                 | 0.57585400  | 4.03573600  | H  | -4.83200000  | 8.07200000  | 1.08100000  | H | 17.95700000  | 3.25700000  | 2.11200000  |
| C                            | 7.65304400  | 2.77565400  | -2.79589300 | C | -0.83712100                 | 1.55755800  | 4.55518300  | C  | -5.58600000  | 7.98800000  | -0.86200000 | H | 18.78400000  | 1.87500000  | 2.81200000  |
| H                            | 8.72443000  | 2.88075000  | -2.96562400 | H | -0.38046100                 | 2.53378500  | 4.35474000  | H  | -6.03700000  | 8.87000000  | -0.80800000 | C | 19.92200000  | 2.92600000  | 1.33000000  |
| H                            | 7.06020300  | 3.68398000  | -2.79238300 | H | -0.83088300                 | 1.43189700  | 5.64596900  | H  | -5.67000000  | 7.45000000  | -1.79900000 | H | 19.75500000  | 3.31500000  | 0.30200000  |
| C                            | 4.66913200  | 3.04898900  | -1.15994100 | C | 0.02350900                  | 0.44901900  | 3.93092200  | C  | -2.08800000  | 6.78900000  | 1.40000000  | H | 20.64400000  | 2.10700000  | 1.27000000  |
| H                            | 4.52075000  | 4.05223000  | -3.74985300 | H | -0.15158000                 | 0.44674800  | 2.84366600  | H  | -1.14600000  | 6.84000000  | 0.84500000  | C | 20.52800000  | 4.01400000  | 2.19900000  |
| H                            | 3.88829100  | 2.87689000  | -4.90385800 | C | 1.52173500                  | 0.76090000  | 4.1297200   | H  | -1.85600000  | 6.44000000  | 2.41000000  | H | 19.87400000  | 4.89700000  | 2.18800000  |
| H                            | 5.63606000  | 3.03220900  | -4.66541500 | H | 1.72157500                  | 1.76073100  | 3.87503400  | H  | -2.48700000  | 7.80100000  | 1.47000000  | H | 20.54400000  | 3.65700000  | 3.23600000  |
| C                            | 5.75675900  | -0.54380900 | -0.81755900 | H | 1.78085400                  | 0.59887200  | 5.18288100  | C  | -6.04900000  | 4.73800000  | -0.91600000 | C | 21.94500000  | 4.44500000  | 1.80800000  |
| H                            | 6.83650500  | -0.44733500 | -0.81277000 | C | 2.44748300                  | -0.18745400 | 3.27077900  | H  | -6.70500000  | 5.60000000  | -0.94000000 | H | 22.59100000  | 3.56500000  | 1.86300000  |
| N                            | 3.80435200  | -1.82239500 | 0.15070100  | H | 1.96302500                  | -0.33428400 | 2.28078600  | N  | -5.92500000  | 2.37900000  | -1.56700000 | C | 13.52200000  | -1.85500000 | -0.22400000 |
| C                            | 5.21200100  | -1.54602800 | 0.02767900  | H | 2.44277000                  | -1.19586300 | 3.78929500  | C  | -6.56800000  | 3.55400000  | -1.50300000 | H | 12.76600000  | -2.24500000 | -0.90800000 |
| C                            | 3.79537000  | -2.82755700 | 1.08868900  | C | 3.85764300                  | 0.30746800  | 3.09138500  | C  | -6.75000000  | 1.50700000  | -2.24400000 | H | 13.67400000  | -2.59400000 | 0.57000000  |
| C                            | 5.11986300  | -3.21003500 | 1.55780900  | H | 4.17625300                  | 0.83624000  | 4.00096700  | C  | -7.87500000  | 2.18000000  | -2.62000000 | H | 14.45200000  | -1.76900000 | -0.78700000 |
| C                            | 6.00394400  | -2.39096400 | 0.90541900  | H | 4.52951000                  | -0.55308400 | 2.98178600  | C  | -7.86500000  | 3.46800000  | -2.15000000 | C | 18.85600000  | 0.24200000  | 0.54700000  |
| C                            | 7.49155600  | -2.3268600  | 1.04873300  | C | 4.08942200                  | 1.21727100  | 1.87291000  | C  | -8.85800000  | 4.58300000  | -2.21900000 | H | 18.10900000  | -0.42900000 | -0.18000000 |
| H                            | 7.80948000  | -1.33623400 | 1.40100400  | H | 3.93056700                  | 0.60678100  | 0.97743200  | H  | -8.42900000  | 5.47300000  | -2.68800000 | H | 18.92600000  | -0.32000000 | 1.44700000  |
| H                            | 7.9976400   | -2.50663400 | 0.09406000  | C | 3.08823900                  | 2.37975000  | 1.78535500  | H  | -9.18800000  | 4.86200000  | -1.21400000 | H | 19.57900000  | 0.52300000  | 0.03600000  |
| H                            | 7.85254100  | -3.06137000 | 1.76456600  | H | 2.08482900                  | 1.96980400  | 1.67549000  | H  | -9.73700000  | 4.29600000  | -2.79800000 | C | 22.47300000  | 5.48500000  | 2.79600000  |
| C                            | 5.40208100  | -1.19723300 | 2.63982200  | H | 3.10544300                  | 2.95087700  | 2.72349000  | C  | -9.09000000  | 1.59000000  | -3.42200000 | H | 21.85700000  | 6.38900000  | 2.76200000  |
| H                            | 6.40489200  | -1.41616000 | 2.50512900  | C | 3.35717600                  | 3.34654800  | 0.62707600  | H  | -10.02600000 | 2.10900000  | -3.19400000 | H | 23.50100000  | 5.77300000  | 2.55800000  |
| C                            | 4.71034000  | -3.60458000 | 1.78191000  | H | 3.64518700                  | 2.78155000  | -0.26587200 | H  | -9.24200000  | 0.54500000  | -3.12900000 | H | 22.45600000  | 1.01600000  | 3.82000000  |
| C                            | 5.28753600  | -3.56376600 | 4.03322000  | H | 4.19371500                  | 4.00483000  | 0.87212900  | C  | -8.87000000  | 1.86300000  | -4.93000000 | C | 22.00200000  | 5.98100000  | 0.38100000  |
| H                            | 5.46665300  | -4.29828300 | 4.82028600  | C | 2.10716600                  | 4.18494400  | 0.32600600  | H  | -9.63400000  | 1.21900000  | -5.50300000 | H | 21.31000000  | 4.89400000  | 2.69000000  |
| H                            | 4.29349800  | -3.13394800 | 4.17833800  | H | 1.41558300                  | 3.56968500  | -0.26584800 | H  | -7.89200000  | 1.13700000  | -5.17700000 | H | 21.73200000  | 4.23400000  | -0.35800000 |
| H                            | 6.00357500  | -2.75506200 | 4.14385000  | H | 1.58947200                  | 4.44520000  | 1.26648600  | H  | -8.69900000  | 2.70200000  | -5.24000000 | H | 23.00600000  | 5.34800000  | 0.14000000  |
| C                            | 2.60509100  | -3.34755900 | 1.57179300  | C | 2.35913000                  | 5.49933500  | -0.41584500 | C  | -6.46000000  | 0.17200000  | -2.49500000 | C | -8.10700000  | 1.27000000  | 0.63200000  |
| H                            | 2.68288400  | -1.13636500 | 2.34482700  | H | 2.97258500                  | 6.13521900  | 0.23551800  | H  | -7.20500000  | -0.40300000 | -3.03800000 | D | -7.96100000  | 2.43900000  | 0.88300000  |
| C                            | 1.31009100  | -2.88409300 | 1.78191000  | C | -0.36120400                 | -0.91860200 | 4.49985800  | C  | -5.29500000  | -0.50700000 | -2.11010000 | C | -9.39300000  | 0.62300000  | 0.11800000  |
| N                            | 1.08962400  | -1.84249400 | 0.38536100  | H | -1.3879100                  | -1.19138200 | 4.28258200  | N  | -4.25400000  | 0.37200000  | -1.44900000 | H | -9.74200000  | 1.17000000  | -0.75800000 |
| C                            | 2.10887500  | 1.18805500  | -2.82962400 | H | -0.23588500                 | -0.90970700 | 5.58797100  | C  | -1.65200000  | 1.32000000  | 0.83400000  | H | -10.15300000 | 0.70200000  | 0.89700000  |
| C                            | 2.03427200  | 2.7007800   | -3.22553600 | C | 0.27403200                  | -1.70664300 | 4.08269400  | H  | -0.89200000  | 4.35400000  | 1.34200000  | C | -9.04600000  | -0.84400000 | -0.16300000 |
| C                            | 0.92416700  | 1.51038800  | -2.19449500 | C | 5.54186000                  | 1.69449400  | 1.85157000  | C  | -1.33600000  | 2.43400000  | 0.59600000  | H | -9.02600000  | -1.07400000 | -1.23300000 |
| N                            | 0.75229300  | 0.4872500   | -1.34874900 | H | 6.22205000                  | 0.84352200  | 1.95627800  | N  | -2.11000000  | 1.52400000  | -0.00900000 | H | -9.73400000  | -1.55800000 | 0.29100000  |
| C                            | -0.52120700 | 0.53208400  | -0.80398800 | H | 5.73510000                  | 2.38767900  | 2.67877000  | C  | -1.43300000  | 0.32900000  | -0.13600000 | C | -7.65000000  | -0.02200000 | 0.38200000  |
| C                            | -0.18369700 | -1.49714800 | 0.54965260  | H | 5.78920800                  | 2.18963700  | 0.91455400  | C  | -3.30600000  | -0.78100000 | -1.30000000 | C | -7.12800000  | 0.17200000  | 0.79500000  |
| C                            | -0.97578500 | -0.40723100 | 0.07518700  | C | 1.03601700                  | 6.21634200  | -0.68494900 | C  | -1.98500000  | -0.76200000 | -0.74100000 | C | -5.75200000  | 0.29200000  | 1.18300000  |
| C                            | 0.10101500  | -2.32759000 | 1.95187400  | H | 0.47523000                  | 5.62350500  | -1.36835100 | C  | -4.97700000  | -1.88600000 | -2.33900000 | D | -5.12000000  | 1.33000000  | 1.29000000  |
| C                            | -0.84574600 | -2.33268000 | 1.47254900  | H | 1.19575500                  | 7.19328100  | -1.14878670 | C  | -3.69700000  | -2.04100000 | -1.81600000 | D | -5.09600000  | -0.88000000 | 1.41500000  |
| C                            | -0.09083700 | -4.29837800 | 2.98740000  | H | 0.46083200                  | 6.36279000  | 0.232710500 | C  | -5.83700000  | -2.90400000 | -3.01800000 | C | -6.87300000  | -2.21400000 | 0.45200000  |
| H                            | -0.05493100 | -5.29937800 | 2.54353200  | C | 3.12438300                  | 5.2765100   | -1.71783800 | H  | -6.87200000  | -2.84000000 | -2.67000000 | C | -5.59400000  | -2.08500000 | 1.03400000  |
| H                            | -1.06094600 | -4.76107000 | 3.46986100  | H | 2.53930100                  | 4.63006400  | -2.38480800 | H  | -5.45900000  | -3.90600000 | -2.81400000 | C | -6.43700000  | -4.61040000 | 0.12700000  |
| H                            | 0.68606800  | -1.25768000 | 3.75505800  | H | 4.08232500                  | 4.77566200  | -1.53794900 | H  | -5.84000000  | -2.75300000 | -4.10100000 | C | -4.77400000  | -3.17300000 | 1.20400000  |
| C                            | -2.20486800 | -1.95139900 | 1.68009400  | H | 3.31589200                  | 6.21596700  | -2.23438600 | C  | -2.64100000  | -3.01000000 | -1.54200000 | H | -6.69800000  | -5.58600000 | -0.23700000 |
| D                            | -3.14078100 | -2.34878700 | 2.23970200  | C | 1.1818100                   | -3.05783900 | -2.36538600 | D  | -2.64100000  | -4.20600000 | -1.59900000 | C | -5.20200000  | -4.40600000 | 0.74500000  |
| C                            | -2.20892700 | -0.42618600 | 0.98567900  | D | 2.19538800                  | -2.37920500 | -2.47073000 | C  | -1.39900000  | -2.12300000 | -1.08600000 | C | -7.26500000  | -3.50000000 | -0.10100000 |
| H                            | -1.97383200 | 0.210084200 | 1.85763000  | C | 11124300                    | -4.43844700 | -1.74553500 | H  | -0.78700000  | -2.05800000 | -1.99500000 | D | -8.47000000  | -3.55000000 | -0.62000000 |
| C                            | -3.55502000 | 0.08240600  | 0.55340500  | H | 1.84742700                  | -4.52250600 | -0.94583300 | C  | -0.55300000  | -2.83100000 | -0.06000000 | C | -8.89200000  | -4.79200000 | -1.15800000 |
| D                            | -4.36904800 | 0.1608400   | 1.60273600  | H | 1.35764400                  | -5.16673300 | -2.52234300 | D  | 0.15900000   | -3.80500000 | -0.62700000 | H | -8.19300000  | -5.13700000 | -1.92600000 |
| C                            | -5.68331800 | 0.64877700  | 1.32286100  | C | -0.34630500                 | -4.56440400 | -1.27778900 | C  | 0.93200000   | -4.60400000 | 0.27000000  | H | -9.86500000  | -4.80600000 | -1.16060000 |
| H                            | -5.62273100 | 1.66660600  | 0.93433700  | H | -0.42940900                 | -4.46798300 | -0.19407280 | H  | 1.40900000   | -5.35900000 | -0.34800000 | H | -9.98500000  | -5.54700000 | -0.37400000 |
| H                            | -6.20498900 | 0.63745600  | 2.27590500  | H | -0.82801900                 | -5.50501500 | -1.54890600 | H  | 0.28300000   | -5.06800000 | 1.01600000  | D | -4.29400000  | 0.91800000  | 0.91800000  |
| H                            | -6.17701800 | -0.10713200 | 0.60326000  | C | -1.05452600                 | -3.48787200 | -1.93646500 | H  | 1.67700000   |             |             |   |              |             |             |



chl a 2-E-2AFB<sub>1</sub>

01

Mg -2.50845900 -0.47355000 -0.88537000  
N -3.40087500 -1.91142000 -1.99757600  
C -4.72343600 -2.24999900 -1.93675700  
C -4.95352800 -3.40836000 -2.80987500  
C -3.75269500 -3.70992600 -3.38656000  
C -2.78793800 -2.74276500 -2.85264600  
C -6.24847400 -4.08300000 -2.99602000  
H -7.12106900 -3.41152000 -0.0266000  
C -6.42454500 -5.37578600 -3.13004000  
H -7.41028700 -5.79870900 -3.27405600  
H -5.58026700 -6.06808300 -3.07365300  
C -3.43437900 -4.76282900 -4.39759900  
H -2.96309200 -5.63786200 -3.93723200  
H -2.74557700 -4.37661900 -5.15216200  
H -4.34243600 -5.09461000 -4.90010600  
C -5.68337500 -1.61855500 -1.17455000  
H -6.69257700 -2.00369200 -1.26446500  
N -4.31793500 0.00898500 0.04578200  
C -5.50843600 -0.53403000 -0.26757700  
C -4.55133300 0.02949000 0.93873000  
C -5.97939000 1.16545000 1.20343000  
C -6.57465000 0.14715000 0.45164600  
C -8.04378800 -0.14844000 0.38205500  
H -8.28036700 -0.86078900 -0.40888600  
H -8.61083000 0.76364000 0.17933400  
H -4.40308000 -0.56702400 1.32288500  
C -6.62928200 2.04549600 2.17610400  
H -7.6859500 2.51335900 1.9155500  
H -8.1895300 3.04530300 2.10224300  
C -6.50540800 1.53489000 3.67933000  
H -6.99480000 2.20868200 4.32378400  
H -5.45464000 1.43703800 3.90349000  
H -6.9833700 0.54485300 3.71049000  
C -3.58654500 1.92550700 1.40053300  
H -8.93437400 2.70569700 2.07321000  
C -2.22925300 1.95008500 1.05736600  
C -1.85387600 0.88897700 2.40075900  
C -1.4734800 -2.72038400 -3.16515300  
H -1.07908900 -3.45986200 -3.88285700  
C -0.43513400 -1.84233400 -2.89555500  
N -0.59898000 -0.87824000 -1.79137700  
C -0.58983500 -0.23526300 -1.54353800  
C -0.39317400 1.32915400 0.09330300  
C -0.6947500 0.810408700 -0.65723200  
C -1.24866900 2.94402200 1.41843900  
C -0.08165400 2.52148400 0.8071000  
C -1.46644600 4.1763700 2.24204800  
H -2.2803900 4.7723200 1.84009800  
H -0.56368200 4.78408300 2.27407600  
H -1.07296800 3.91658500 3.27782400  
C 1.32334700 2.83750700 0.59212600  
D 1.97442100 3.7872200 0.95798300  
C 1.90772700 1.61548000 -0.22105100  
H 2.46055300 1.01616800 0.54316300  
C 2.93887900 2.04203200 -1.23598700  
C 0.04655200 2.4698800 -0.60680900  
C 5.10736300 2.8848200 -1.46228400  
H 5.52227300 2.30376300 -1.98845700  
H 5.85523100 3.3307200 -0.80412800  
H 4.7478100 3.63084400 -2.18374500  
D 2.83949600 2.0160600 -2.43285300  
C 1.01018920 1.19692700 -3.19849700  
H 1.42396900 -2.8947900 -2.92346700  
C 1.69854800 -0.78806700 -2.41276300  
H 1.99520700 0.01652700 -3.09368700  
C 1.09235300 -1.5772500 -4.74095500  
H 0.57742700 -2.52469400 -5.25400000  
H 2.13750800 -1.7863700 -5.03476800  
H 0.63723000 -0.7737000 -4.99139000  
C 2.92263500 -1.23481600 -1.60829300  
H 7.1273700 -2.19504200 -1.02877700  
C 1.83262700 -0.52193800 -0.80882300  
H 4.83395500 -1.36982500 -2.47348000  
H 4.14136700 -2.22101200 -3.15319600  
H 4.31452900 -0.44783400 -3.04699800  
C 5.38749700 -1.58733400 -1.58887600  
C 5.95577500 -2.6160500 -1.38009600  
D 5.7348800 -0.4700400 -0.99202700  
C 6.89044300 -0.45392500 -0.18220600  
H 7.74704200 -0.78332900 -0.7048000  
H 6.77254500 -1.09213500 0.66501800  
C 7.08481000 0.91895500 0.43277700  
C 6.59249000 1.36778900 1.59048600  
H 7.6278000 1.61061700 -0.20495000  
C 6.76697800 2.81076000 1.98066100  
H 5.78747500 3.29251600 2.07476000  
H 7.35530900 3.36251800 1.24631000  
H 7.2609500 2.8973200 2.9533300  
C 3.77316300 0.55387200 2.56638800  
H 6.05524000 -0.5037400 2.55889900  
H 5.98439200 0.9213800 3.57619300  
C 4.26615700 0.70203600 2.2970800  
H 4.03052500 0.1080100 1.39802900  
H 4.06276300 1.74329500 2.02093300  
C 3.35766500 0.2694200 3.45262600  
H 3.22776300 -0.8168500 3.41469100  
H 3.84672700 0.48590700 4.40992100  
C 1.97862400 0.9519200 3.43366700  
H 1.58497800 0.88465800 2.4471300  
C 0.96034600 0.22943200 4.32405900  
H 1.09796100 -0.8529800 4.27738800  
H 1.15310800 0.48150800 5.37857600  
C -0.48502700 0.5463700 3.96583200

chl a 2-AFB<sub>1</sub>c

01

Mg -4.27683300 0.06861500 -1.14368300  
N -5.32605000 -1.64703700 -1.05747600  
C -6.64745000 -1.77465200 -0.68413400  
C -7.02686900 -3.18491800 -0.77329300  
C -5.90359600 -3.87263300 -1.0388000  
C -4.85235200 -2.88469400 -1.31966000  
C -8.35500500 -3.7516200 -0.52669800  
H -8.38046900 -4.70687400 -0.00769800  
C -8.50403900 -3.19658700 -0.91149500  
H -10.45235200 -3.67606900 -0.70223200  
H -5.52602400 -2.26675000 -1.46873700  
C -5.73888600 -5.34278700 -1.33924000  
H -4.98667600 -5.75148500 -0.65803800  
H -5.4482200 -5.56027900 -2.36062500  
H -6.7668500 -5.8722000 -1.68033900  
C -7.42638100 -0.75600500 -0.18225000  
H -8.41603700 -1.0294000 0.16536500  
N -5.89563400 1.14021200 -0.45439100  
C -7.06437800 0.60565900 -0.03579600  
C -5.9527200 2.48602300 -0.17759800  
C -7.02681400 2.79672200 0.46859800  
C -7.89955100 1.6702800 0.56995300  
C -8.23942400 1.3666300 1.08494800  
H -8.16865100 0.62652300 1.9877900  
H -8.95498700 0.98735200 0.44984800  
H -8.65152700 2.28146200 1.16189500  
C -5.78830300 4.14251500 1.0064700  
H -8.6714900 4.21868200 1.07485800  
H -7.27069600 4.92429500 0.3095700  
C -6.96108400 4.3928600 2.38538200  
H -7.2148100 5.38564700 2.76252300  
H -5.8722900 4.3075700 2.33316800  
H -7.31427100 3.64849700 3.10267600  
C -4.94937500 3.40885000 -0.48308700  
H -5.15539800 4.45198700 -0.26316400  
C -3.70664800 3.11612600 -1.0407500  
N -3.3057800 1.8136400 -1.29593300  
C -3.5484300 -3.19016100 -1.7473400  
H -3.31943500 -2.2412200 -1.85572800  
C -2.4894200 -2.30540400 -1.95621000  
N -2.54521900 -0.96532900 -1.83719500  
C -1.33088000 -0.41373800 -2.18086200  
C -2.0721400 1.89777700 -1.7734300  
C -1.0578500 0.93684700 -2.1646100  
C -2.65898200 4.03927400 -1.40405500  
C -1.63228900 3.23931900 -1.8745100  
C -2.6886900 5.52724800 -2.72685100  
H -3.48416800 5.95821300 -1.87691400  
H -1.74257400 5.94748500 -1.6718000  
H -2.85045500 5.83010400 -0.23820800  
C -2.0768100 3.24408700 -2.41366400  
D 0.4399100 4.15824600 -2.73675500  
C 0.16278700 1.72873200 -2.44041500  
H 0.84436600 1.66473500 -1.58931900  
C 0.99861500 1.36457500 -3.64094400  
D 2.24256300 1.81675100 -3.46724300  
C 3.17049600 1.5445800 -4.50938100  
H 3.38837300 0.44508000 -4.50888800  
H 4.06783800 2.07993500 -4.27400600  
H 2.76361800 1.80974700 -5.47680200  
D 0.63446600 0.73398200 -4.59778500  
C -1.12910700 -2.78966600 -2.40815900  
H -0.68653100 -3.36790300 -1.5878700  
C -0.34518700 -1.47938600 -2.61100000  
H -0.13317700 -1.32434400 -3.67488400  
C -1.01819700 -3.66598800 -3.66032200  
H -1.73315300 -4.59120600 -3.48408400  
H -0.1705300 -3.9314400 -3.97945400  
H -1.66792100 -3.12844400 -4.4771900  
D 0.16576900 -1.41199300 -1.84553900  
H 0.79574500 -1.61225000 -0.78296600  
H 1.93780500 -0.41093100 -1.91237400  
C 2.02669000 -2.38478000 -2.39501900  
H 1.78123100 -3.42704200 -2.2147800  
H 2.13052700 -2.2218200 -3.47265100  
C 3.3613100 -2.11968100 -1.74305600  
D 3.96867800 -2.88951200 -1.04154800  
C 3.77851700 -0.87797200 -2.0190500  
C 4.9677700 -0.45431600 -1.30272300  
H 5.75662900 -1.17544300 -1.05097700  
H 4.74285800 -0.4957300 -0.23518100  
C 5.3557700 0.90854500 -1.76474000  
C 5.13202700 2.04655300 -1.1015400  
H 5.88159100 0.95301300 -2.74468100  
C 5.57386700 3.36688200 -1.66673300  
H 4.78193500 4.04490000 -1.75367400

H 6.03349300 3.25088200 -2.64852600  
H 6.30728900 3.8432100 -1.00768900  
C 4.38159700 1.2150200 0.20909900  
H 4.6050900 0.12639400 0.84982200  
H 4.7084000 0.30166900 0.75430000  
C 2.88547700 1.81468700 -0.00906600  
H 2.5785100 1.27765800 -0.55476500  
H 2.62589100 3.02626400 -0.66892300  
C 2.07566800 2.26749600 1.30069400  
H 2.1776310 1.3022200 1.82664800  
H 2.52058300 0.2395900 1.95496200  
C 0.58835300 2.5941200 1.09648000  
H 0.21863500 1.97227900 0.27003300  
C -0.28686600 2.24625600 2.30779400  
H 0.11484500 1.36989500 2.92787200  
H -0.2574300 3.07406200 3.02822400  
C -1.73834200 1.95157500 1.9174800  
H -1.7667600 0.97880400 1.40977500  
H -2.08630900 2.68046200 1.16829400  
C -2.68227500 1.93722500 3.1230600  
H -2.21476800 1.43970200 3.95207600  
H -2.79235700 3.01366300 3.44067700  
C -4.0279700 1.3654400 2.88516000  
H -4.5261040 1.83516300 2.0015100  
C -3.9670200 -0.15106700 2.62829800  
H -3.61844700 -0.33212500 1.60224300  
H -1.85368800 -0.56244000 3.28230700  
C -5.2477700 -0.95160600 2.85957400  
H -5.0877700 -0.50032400 2.29175500  
H -5.5249500 -0.87903500 3.9181000  
C -5.10013500 -2.42705900 2.48954300  
H -5.15885800 -2.5415400 1.40075600  
H -4.10015200 -2.77280300 2.78086400  
C -1.63580000 -3.34586800 3.15093700  
H -5.93165800 -3.35038700 4.22972400  
C 0.40645800 -2.0716500 0.73214400  
H 0.92068800 4.24692900 -0.18994700  
H 0.80440600 4.69387200 1.54028700  
H -0.64826900 4.32199700 0.60477100  
C -0.9603300 1.67967200 4.09289500  
H -4.96284300 2.75327400 4.29557800  
H -4.58952800 1.7116800 4.98897900  
H -5.9943100 1.36831600 3.93004700  
C -5.9669700 -4.77380700 2.62653400  
H -6.21802100 -4.8065400 1.55630700  
H -6.66479900 -5.48062900 3.13998800  
H -4.96583900 -5.14270100 2.75734400  
C -5.76570400 -2.8502500 2.94409700  
H -7.78086200 -2.7698800 1.87709000  
H -7.72579800 -1.86755100 3.39495000  
H -8.26868000 -3.5437500 3.8775800  
C 8.0216800 3.0200600 1.07719700  
D 8.61539600 3.73918200 0.3140900  
H 7.34307300 3.46697600 2.36978000  
H 6.63931200 2.12777600 -0.13477400  
H 8.10214600 3.88594300 3.03236500  
C 6.66254200 2.2211000 2.9479100  
H 5.57829600 2.32280500 3.02673300  
H 7.01655000 1.95541900 3.94550300  
C 6.99963000 1.1563900 1.97420300  
C 7.76748500 1.56909200 0.94614300  
H 8.21304900 1.02777600 -0.14884400  
D 8.84731300 0.0208100 -1.0823100  
D 7.82842600 -0.62187300 -0.02259100  
C 6.57010800 -0.25041600 2.01505300  
C 7.02433000 -1.08021700 0.96460700  
C 5.25399000 -2.12239200 2.89292900  
C 6.60908000 -2.39163600 0.87933300  
H 4.56933700 -2.56706300 3.59846400  
C 5.73821000 -2.8817300 1.83077400  
C 5.68336600 -0.80435920 2.97886700  
D 5.27785500 0.03932700 3.94934400  
C 4.36817000 -0.44785500 4.92060500  
H 3.43261600 -0.76729300 4.45301600  
H 4.17573200 0.38537500 5.59173400  
H 4.80504300 -1.27891500 5.48087500  
D 5.37743000 -4.15794900 1.62163200  
D 6.75568200 -5.74823100 0.64159800  
C 8.26239100 -1.13676600 0.17888800  
H 8.20820100 -3.65065300 -0.09468700  
C 8.07156800 -5.37330000 0.5143300  
H 8.78070600 -6.1465600 0.76754000  
C 6.9136300 -3.48663900 -0.10934000  
H 6.70831900 -3.18648500 -1.14137400  
C 5.96287000 -4.61516100 0.38831300  
H 5.14324500 -4.88813900 -0.26847900

## Reference

1.- Politzer, P.; Murray, J.S. The fundamental nature and role of the electrostatic potential in atoms and molecules. *Theor Chim Acta* **2002**, 108,134-142.
